# Supplementary material
Source: MDPI journal article supplement (https://www.mdpi.com/2073-4441/15/7/1421)
Supplement: s1 [file s1]

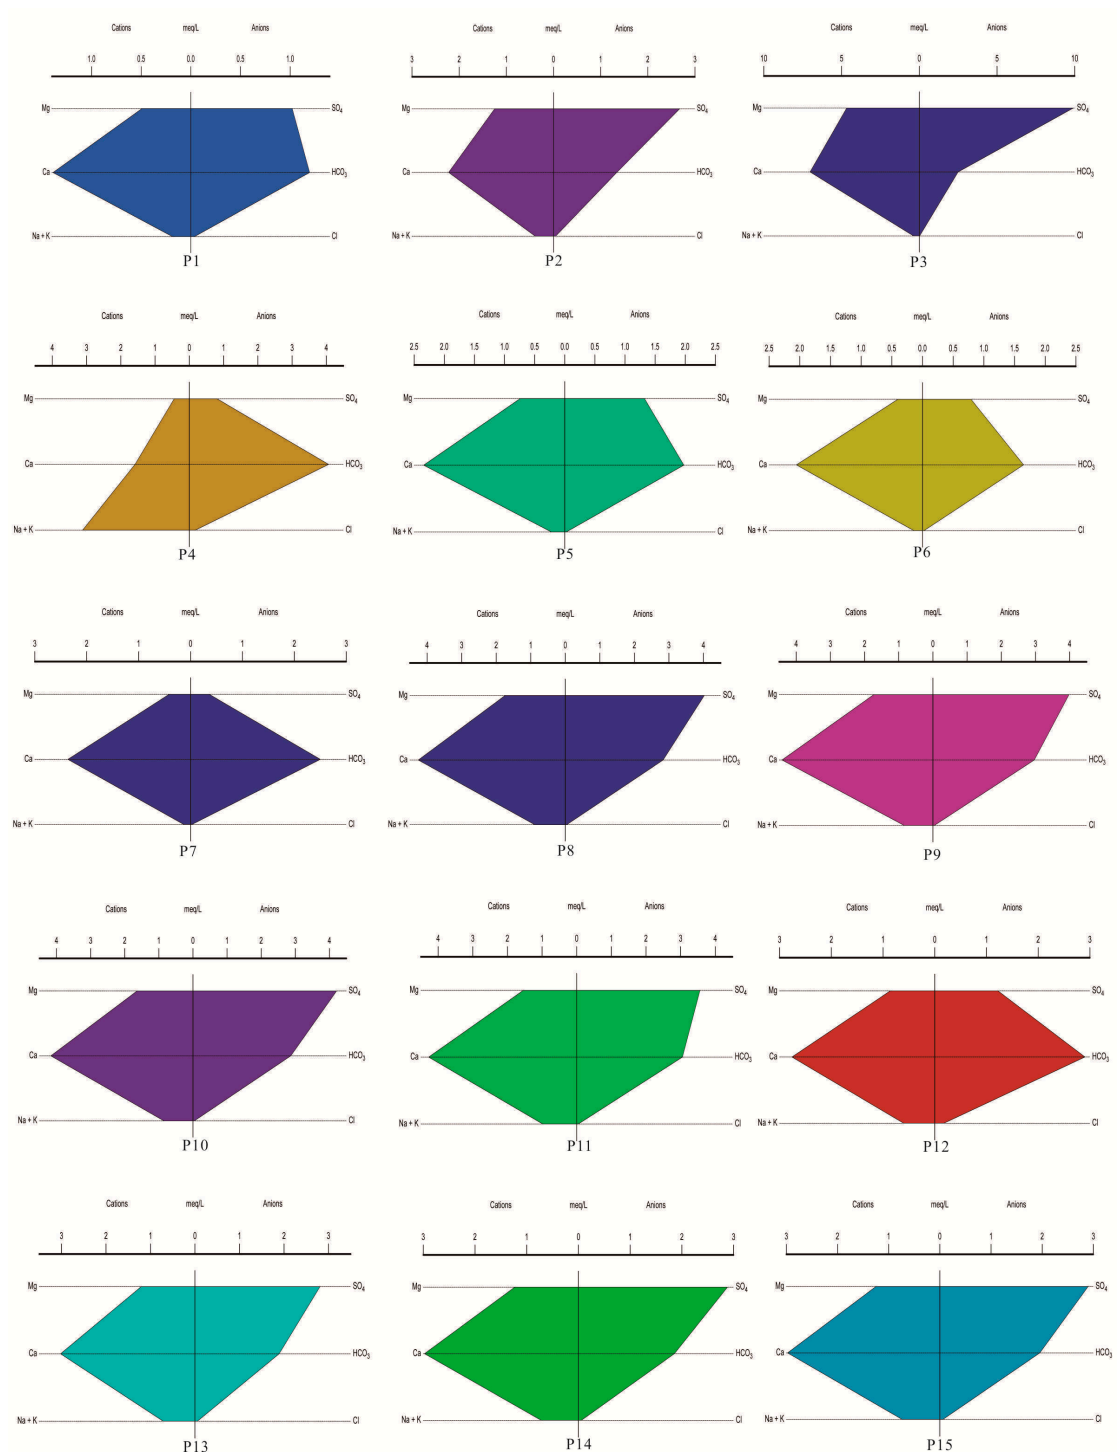

**Figure. S1** Stiff diagrams of water samples in dry season

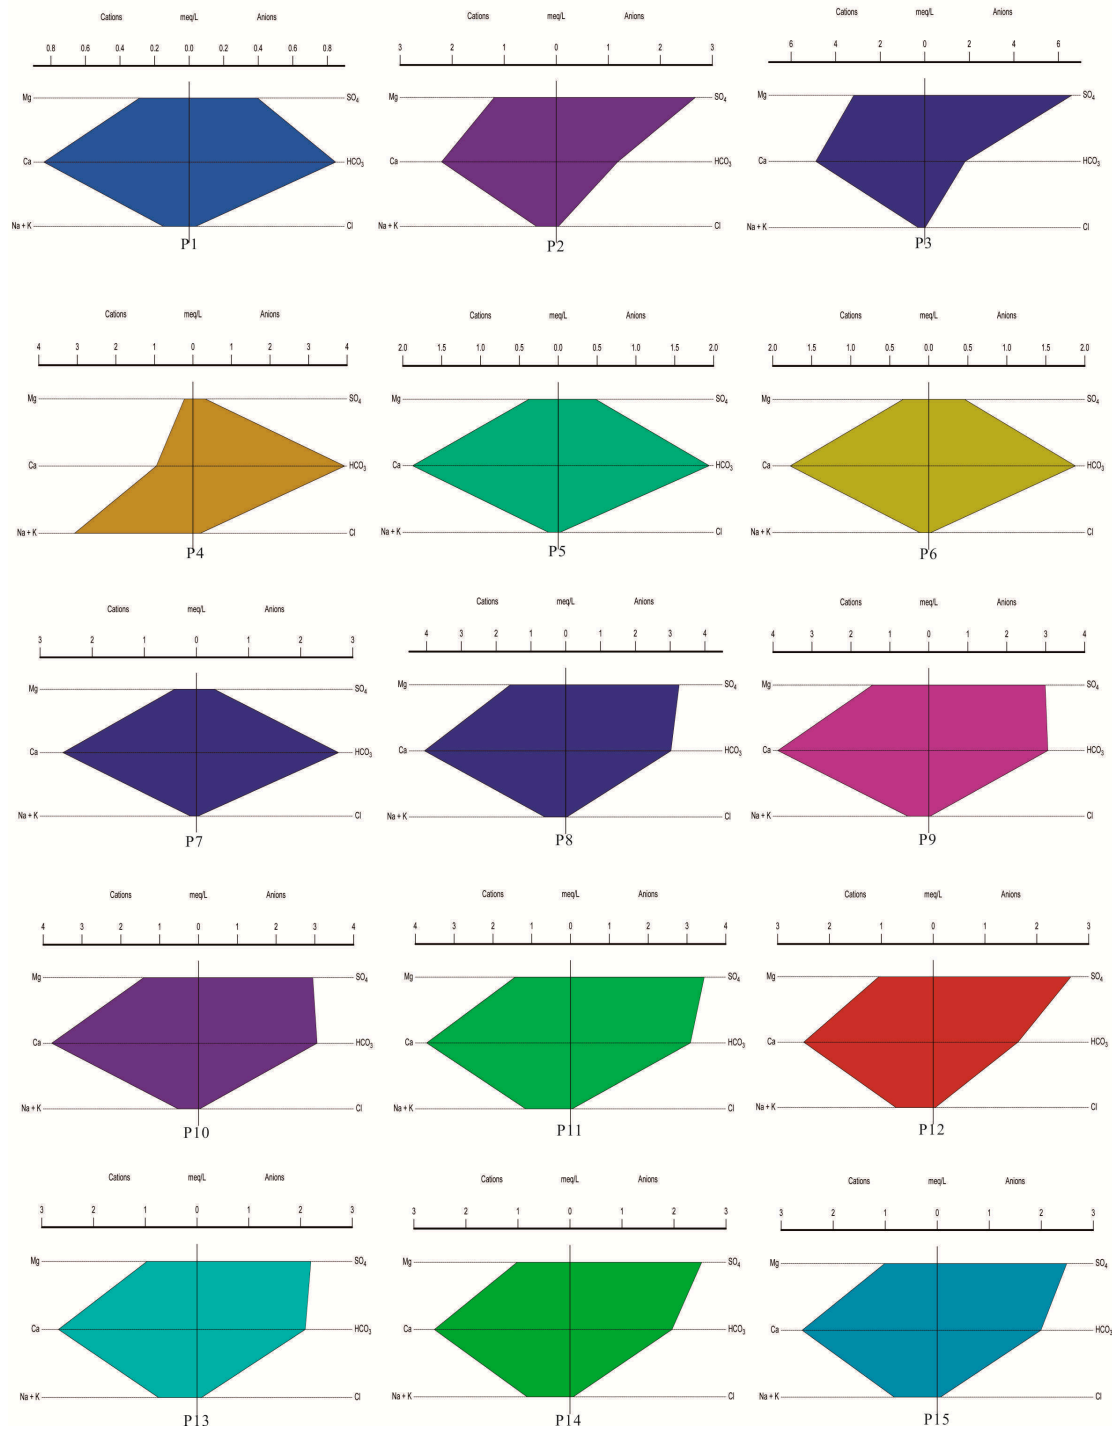

**Figure. S2** Stiff diagrams of water samples in wet season

**Table S1**

The concentration of heavy metals in water samples

| Element<br>( $\mu\text{g/L}$ ) | Cr   | Cu   | Zn    | As   | Cd   | Hg   | Pb   |
|--------------------------------|------|------|-------|------|------|------|------|
| P1                             | 0.15 | 0.43 | 2.65  | 0.15 | 0.02 | 0.03 | 0.10 |
| P2                             | 0.08 | /    | 6.65  | 0.84 | 0.01 | 0.01 | 0.16 |
| P3                             | 0.16 | 0.10 | 10.13 | 0.26 | 0.11 | 0.03 | 0.30 |

|     |       |         |         |       |      |      |       |
|-----|-------|---------|---------|-------|------|------|-------|
| P4  | 0.23  | 0.16    | 0.63    | 0.50  | 0.02 | 0.03 | 0.22  |
| P5  | 0.28  | /       | 0.32    | 0.15  | 0.01 | 0.03 | /     |
| P6  | 0.19  | 0.34    | 1.30    | 0.26  | 0.00 | 0.03 | 0.08  |
| P7  | 0.30  | 6.73    | 39.49   | 0.21  | 0.01 | 0.02 | 0.46  |
| P8  | 0.31  | 0.21    | 1.97    | 0.44  | 0.05 | 0.02 | 0.21  |
| P9  | 0.31  | 0.10    | 1.67    | 0.47  | 0.03 | 0.01 | 0.14  |
| P10 | 0.50  | 0.51    | 1.79    | 0.45  | 0.02 | 0.03 | 0.53  |
| P11 | 0.34  | 0.70    | 21.02   | 0.75  | 0.05 | 0.03 | 0.96  |
| P12 | 0.19  | 0.36    | 10.53   | 0.19  | 0.06 | 0.03 | 0.01  |
| P13 | 0.24  | 0.40    | 6.78    | 0.31  | 0.04 | 0.02 | 0.12  |
| P14 | 0.22  | 0.43    | 6.45    | 0.34  | 0.03 | 0.06 | 0.11  |
| P15 | 0.31  | 0.23    | 4.89    | 0.30  | 0.05 | 0.05 | 0.08  |
| CNS | 50.00 | 1000.00 | 1000.00 | 10.00 | 5.00 | 1.00 | 10.00 |
| WHO | 50.00 | 2000.00 |         | 10.00 | 3.00 | 6.00 | 10.00 |

/: lower than the detectable level

CNS: China Standard (GB 5749-2006); WHO: World Health Organization [12].
